# Supplementary material for: A new reductive dl-mandelic acid loading approach for moisture-stable Mn4+ doped fluorides
Source: Royal Society of Chemistry journal article supplement (doi:10.1039/c8cc05850d), 2018-01-01
Supplement: c8cc05850d1.pdf [file c8cc05850d1.pdf]

## Supporting Information

### **A new reductive DL-mandelic acid loading approach for moisture-stable Mn<sup>4+</sup> doped fluorides**

Lin Huang,<sup>a</sup> Yong Liu,<sup>a</sup> Shuaichen Si,<sup>a</sup> Mikhail G. Brik,<sup>b,c,d</sup> Chengxin Wang<sup>a</sup> and Jing Wang<sup>\*,a</sup>

<sup>a</sup> Ministry of Education Key Laboratory of Bioinorganic and Synthetic Chemistry, State Key Laboratory of Optoelectronic Materials and Technologies, School of Chemistry, School of Materials Science and Engineering, Sun Yat-Sen University, Guangzhou, 510275, P. R. China.

<sup>b</sup> College of Science, Chongqing University of Posts and Telecommunications, Chongqing, 400065, P. R. China.

<sup>c</sup> Institute of Physics, University of Tartu, W. Ostwald Str 1, Tartu, 50411, Estonia.

<sup>d</sup> Institute of Physics, Jan Dtugosz University, Armii Krajowej 13/15, PL-42200 Częstochowa, Poland.

\* E-mail: ceswj@mail.sysu.edu.cn, Tel: +86-20-84112112, Fax: +86-20-84111038.

## Experimental Section

### 1. Synthesis.

#### 1.1 Synthesis of $K_2GeF_6:Mn^{4+}$ (KGFM)

According to the previous report,<sup>1</sup> three-step chemical co-precipitation strategy was used to synthesize KGFM red phosphors.

The first step is to synthesize  $K_2MnF_6$ : starting materials of  $KMnO_4$  (99.5%) and  $KHF_2$  (99.5%) with mass ratio of 1:20 were dissolved in 49% HF aqueous solution. After stirring and cooling for 30 min, 30%  $H_2O_2$  was dropping very slowly in the mixed solution. When the solution changing from purple to brown, the yellow  $K_2MnF_6$  powder was precipitated. By fast filtering and washing using acetone, the yellow powder was then oven-dried at 80 °C for 2 h.

The second step is to synthesize  $K_2GeF_6$ :  $GeO_2$  (1.39 g, 5N) and KF (2.33 g, AR) were dissolved in 7.5 mL 49% HF aqueous solution at room temperature to obtain  $GeO_2/HF$  and  $KF/HF$  solution, respectively. Then the  $KF/HF$  solution was added dropwise to the  $GeO_2/HF$  mixed solution to precipitate  $K_2GeF_6$ . The product was collected by centrifugation and washed by acetone several times. After drying in vacuum at 50 °C for 24 h, white  $K_2GeF_6$  was ready for the next experiments.

The third step is to precipitate KGFM: First, 0.05 g (0.20 mmol)  $K_2MnF_6$  and 0.53 g (2.00 mmol)  $K_2GeF_6$  were added into 5 mL 49% HF in succession, and then a yellow transparent solution was formed soon under stirring (500 rpm). Next, pouring 5 mL ethanol into the yellow solution caused immediate crystallization of lots of yellow crystals. After precipitating for 5 min, the supernatant was discarded and the as-precipitated yellow powders were collected by centrifugation and washed 3 times with acetone, and finally dried at 50 °C for 5 h.

#### 1.2 Synthesis of reference $K_2SiF_6:Mn^{4+}$ (KSFM) and $K_2TiF_6:Mn^{4+}$ (KTFM)

KSFM and KTFM were prepared referring to 1.1 strategy where raw  $K_2GeF_6$  in the third step was replaced by  $K_2SiF_6$  (99.999%) and  $K_2TiF_6$  (99.5%), respectively.

#### 1.3 Synthesis of mandelic acid loading KGFM (KGFM@MA) / KSFM (KSFM@MA) / KTFM (KTFM@MA)

4 g DL-mandelic acid (99.0%, AR) was dissolved in 5 mL ethanol (AR) and continuously stirring at room temperature for 3 hours to generate uniform solution. Then 0.3 g of the as-prepared KGFM / KSFM / KTFM was added in the MA solution under stirring (500 rpm). After continuously stirring for 2 hours, the treated yellow powders were collected by centrifugation and washed by 5 mL ethanol, and finally dried at 80 °C for 5h.

### 2. Analysis and Characterization.

The solid products were characterized by using X-Ray powder diffraction (XRD) studies on D8 ADVANCE powder diffractometer (Bruker AXS, Germany) with  $Cu-K\alpha$  radiation ( $\lambda = 1.54059 \text{ \AA}$ ) at room temperature in the range of  $10^\circ < 2\theta < 70^\circ$ . The morphologies of the as-prepared products were

measured by SEM (FEI Quanta 400). The absorption spectra were recorded with a Cary 5000 UV-Vis-NIR spectrophotometer (Varian) equipped with double out-of-plane Littrow monochromator. The photoluminescence excitation (PLE) and photoluminescence (PL) spectra within the temperature range 293 - 500 K were measured using an Edinburgh Instruments FSP920 Time Resolved and Steady State Fluorescence Spectrometers equipped with a 450 W Xe lamp, a 60 W  $\mu$ F900 microsecond flash lamp, TM300 excitation monochromator and double TM300 emission monochromators and thermo-electric cooled red-sensitive PMT. The spectral resolution of the steady measurements was about 0.05 nm in UV-Vis. The sample was mounted in an Oxford OptistatDN2 nitrogen cryostat for PLE and PL measurements above room temperature. The room temperature inner quantum yield (IQY) of the samples was measured using a barium sulfate coated integrating sphere (150 mm in diameter) attached to the FSP920. The Fourier transform infrared (FT-IR) spectra were measured with a resolution  $1\text{ cm}^{-1}$  in the range  $400 - 4000\text{ cm}^{-1}$  using Bruker EQUINOX 55 spectrometer. X-ray photoelectron spectroscopy (XPS, ESCALAB 250, Thermo Fisher Scientific, USA) measurements were performed to characterize the chemical compositions of the obtained product. Thermal gravimetric (TG) analyses were performed on a Netzsch STA 449F3 instrument in flowing  $\text{N}_2$  with a heating rate of  $5\text{ }^\circ\text{C}/\text{min}$ .

## Results and Discussion

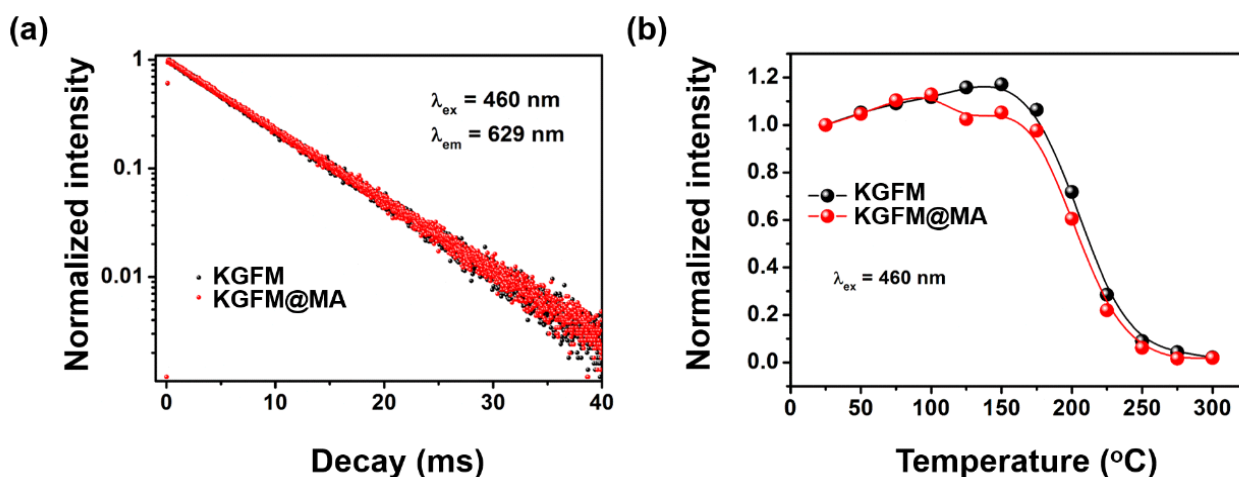

**Fig. S1** (a) Decay curves and (b) thermal quenching curves of KGFM and KGFM@MA.

**Table S1** Compared luminescent properties of KGFM and KGFM@MA

| Sample  | Normalized PL intensity (%) <sup>a</sup> | Decay lifetime (ms) | EQY (%) <sup>b</sup> | $E_{abs}$ (%) <sup>c</sup> | $T_{50\%}$ (°C) <sup>d</sup> |
|---------|------------------------------------------|---------------------|----------------------|----------------------------|------------------------------|
| KGFM    | 100                                      | 6.6                 | 68.8                 | 70.3                       | 212                          |
| KGFM@MA | 99                                       | 6.6                 | 61.7                 | 64.9                       | 206                          |

a. PL was normalized by the integrated intensity of original KGFM.

b. EQY is abbreviation of external quantum yield and is defined as the ratio of the number of emitted photons ( $I_{em}$ ) to the number of excited photons ( $I_{ex}$ ), and can be calculated by the following equation:

$$EQY = \frac{I_{em}}{I_{ex}} = \frac{\int L_S}{\int E_R}$$

Where  $E_R$  is the emission spectrum of the excitation light, recorded with the equipment blank sample in place, and collected using the sphere, and  $L_S$  is the luminescence emission spectrum of the sample.

c.  $E_{abs}$  is abbreviation of absorption efficiency.

d.  $T_{50\%}$  is defined as the heating temperature where the PL strength drops to 50% of the original intensity at room temperature.

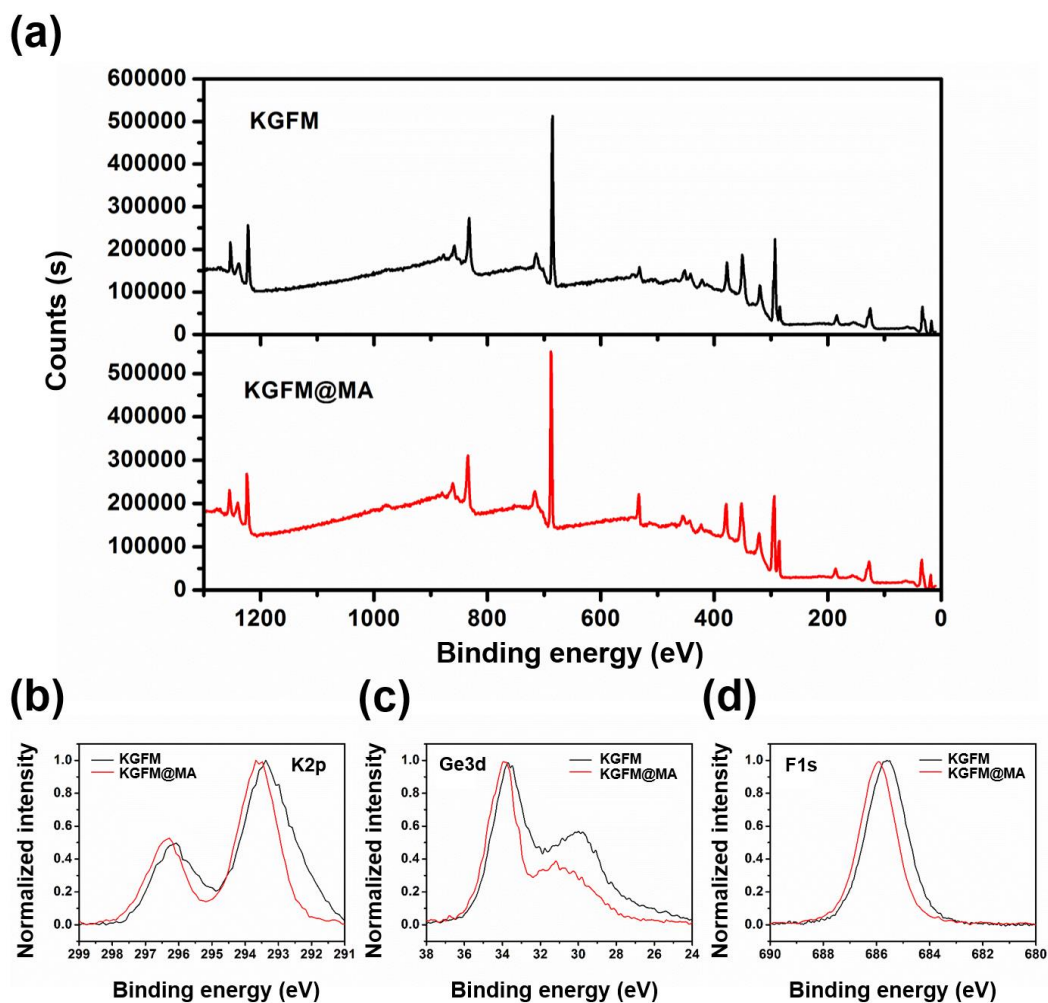

**Fig. S2** (a) XPS survey and normalized spectra of (b) K2p, (c) Ge3d, and (d) F1s of KGFM and KGFM@MA.

**Table S2** Atomic percentage of the surface elements of KGFM and KGFM@MA

| Sample  | Average atomic (%) |      |       |       |      |       |
|---------|--------------------|------|-------|-------|------|-------|
|         | C1s                | O1s  | K2p   | Ge3d  | Mn2p | F1s   |
| KGFM    | 10.7               | 4.91 | 13.43 | 22.35 | 0.67 | 47.94 |
| KGFM@MA | 22.81              | 7.08 | 14.93 | 19.01 | 0.60 | 35.57 |

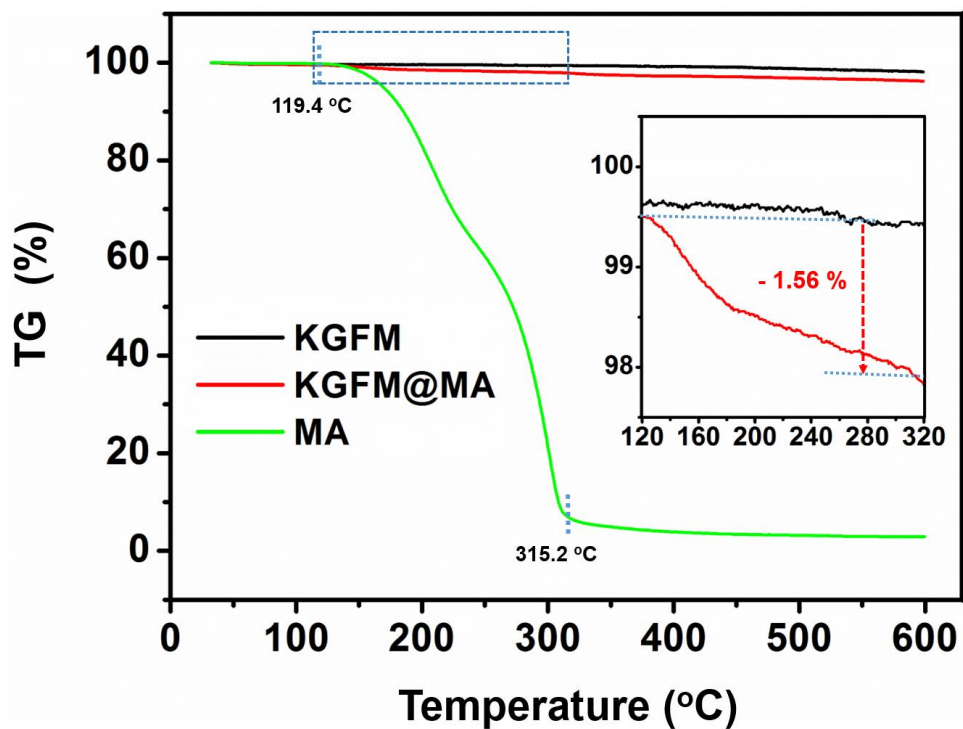

Fig. S3 TG curves of KGFM, KGFM@MA and MA, the inset is the enlarged figure of the selected area.

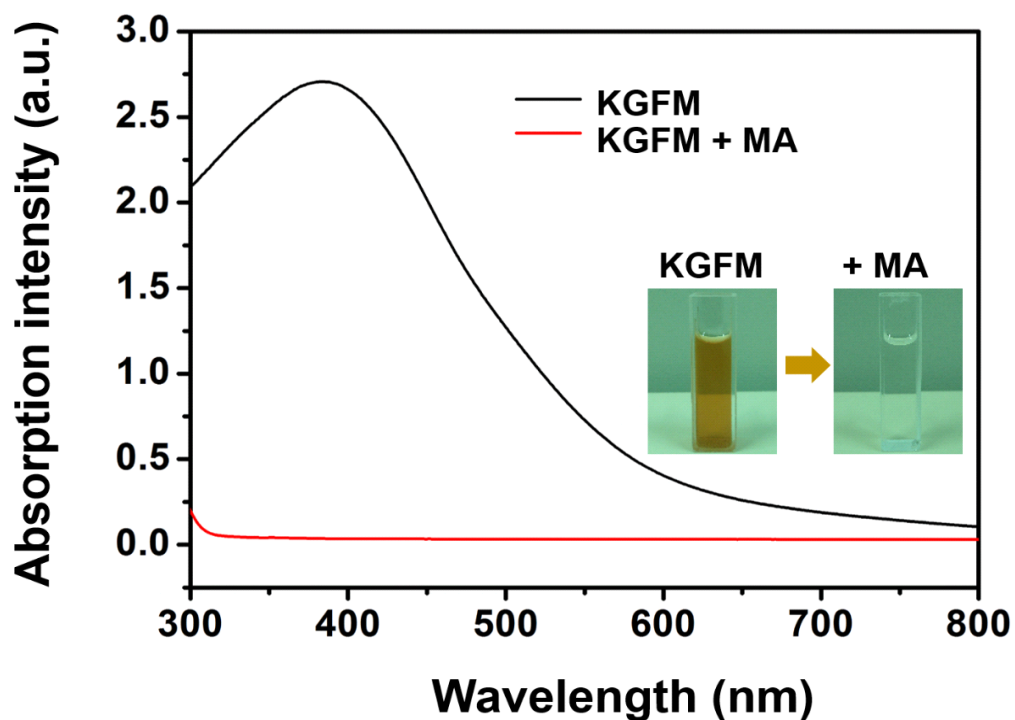

Fig. S4 Absorption spectra and photographs (inset) of KGFM aqueous solution before (black line) and after (red line) loading MA.

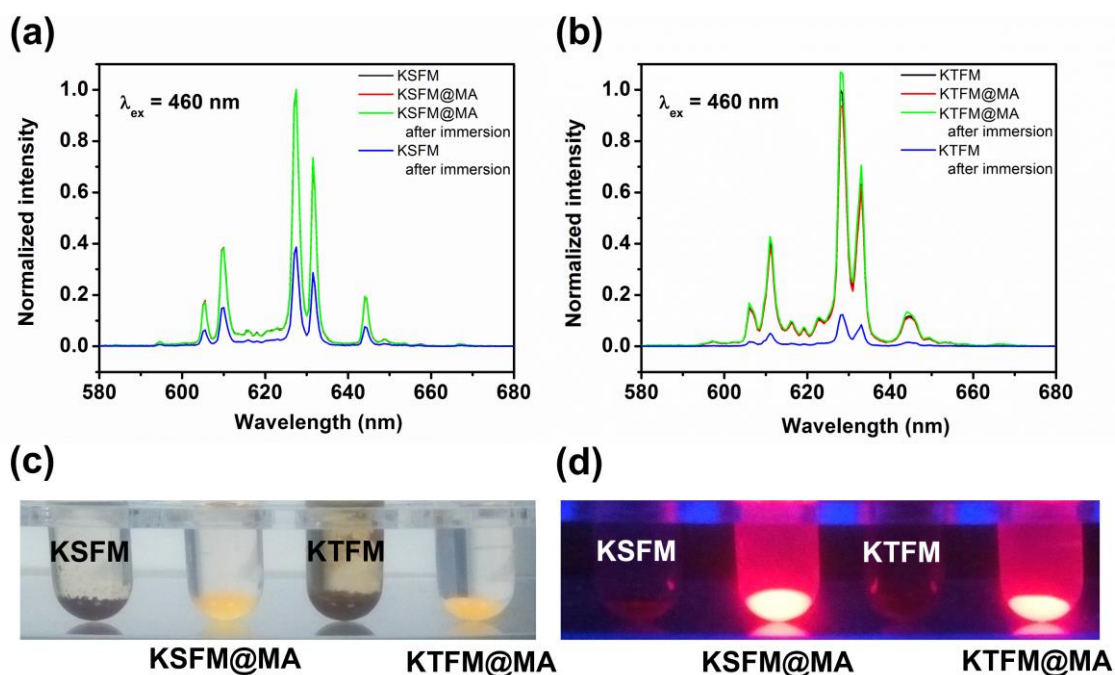

**Fig. S5** Normalized PL spectra of (a) KSFM / KSFM@MA and (b) KTFM / KTFM@MA before/after water erosion for 168 hours, and their photographs after immersion in water for 168 hours, taken under (c) natural light and (d) 365-nm UV-light.

**Table S3** Compared emission intensity (a. u.) of (a) KGFM / KGFM@MA, (b) KSFM / KSFM@MA and (c) KTFM / KTFM@MA before/after water erosion for 168 hours

| Group | Sample  | Initial intensity* | After water erosion* |
|-------|---------|--------------------|----------------------|
| a     | KGFM    | 100%               | 33.2%                |
|       | KGFM@MA | 99.4%              | 98.3%                |
| b     | KSFM    | 100%               | 38.7%                |
|       | KSFM@MA | 100%               | 100%                 |
| c     | KTFM    | 100%               | 12.8%                |
|       | KTFM@MA | 95.9%              | 108%                 |

\* The ratio value is normalized by the integrated intensity of each group's original sample.

## Notes and references

1 W. Zhou, M. H. Fang, S. Lian and R. S. Liu, *ACS Appl. Mater. Interfaces*, 2018, **10**, 17508-17511.
